# Supplementary material for: Initiation codon selection is accomplished by a scanning mechanism without crucial initiation factors in Sindbis virus subgenomic mRNA
Source: PubMed Central journal article supplement — RNA. 2015 Jan;21(1):93–112. doi: 10.1261/rna.047084.114 (PMC4274640; doi:10.1261/rna.047084.114), 2015-01
Supplement: supp_047084.114_SuppMaterial.pdf [file supp_047084.114_SuppMaterial.pdf]

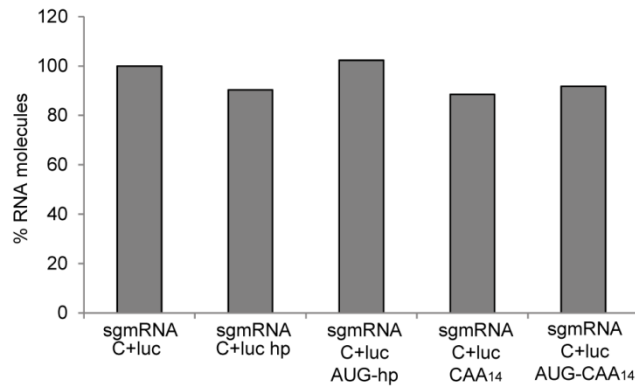

**Figure S1. Analysis of SINV sgmRNA C+luc levels by qRT-PCR.** BHK cells were transfected with Lipofectamine 2000 and *in vitro* prepared SINV sgmRNAs. Total RNA was isolated at 2 hpt and used as template to quantify the amount of SINV sgmRNA C+Luc by qRT-PCR as described in *Materials and Methods*. The relative RNA levels of SINV sgmRNA C+luc variants are represented with respect to SINV sgmRNA C+luc wt.

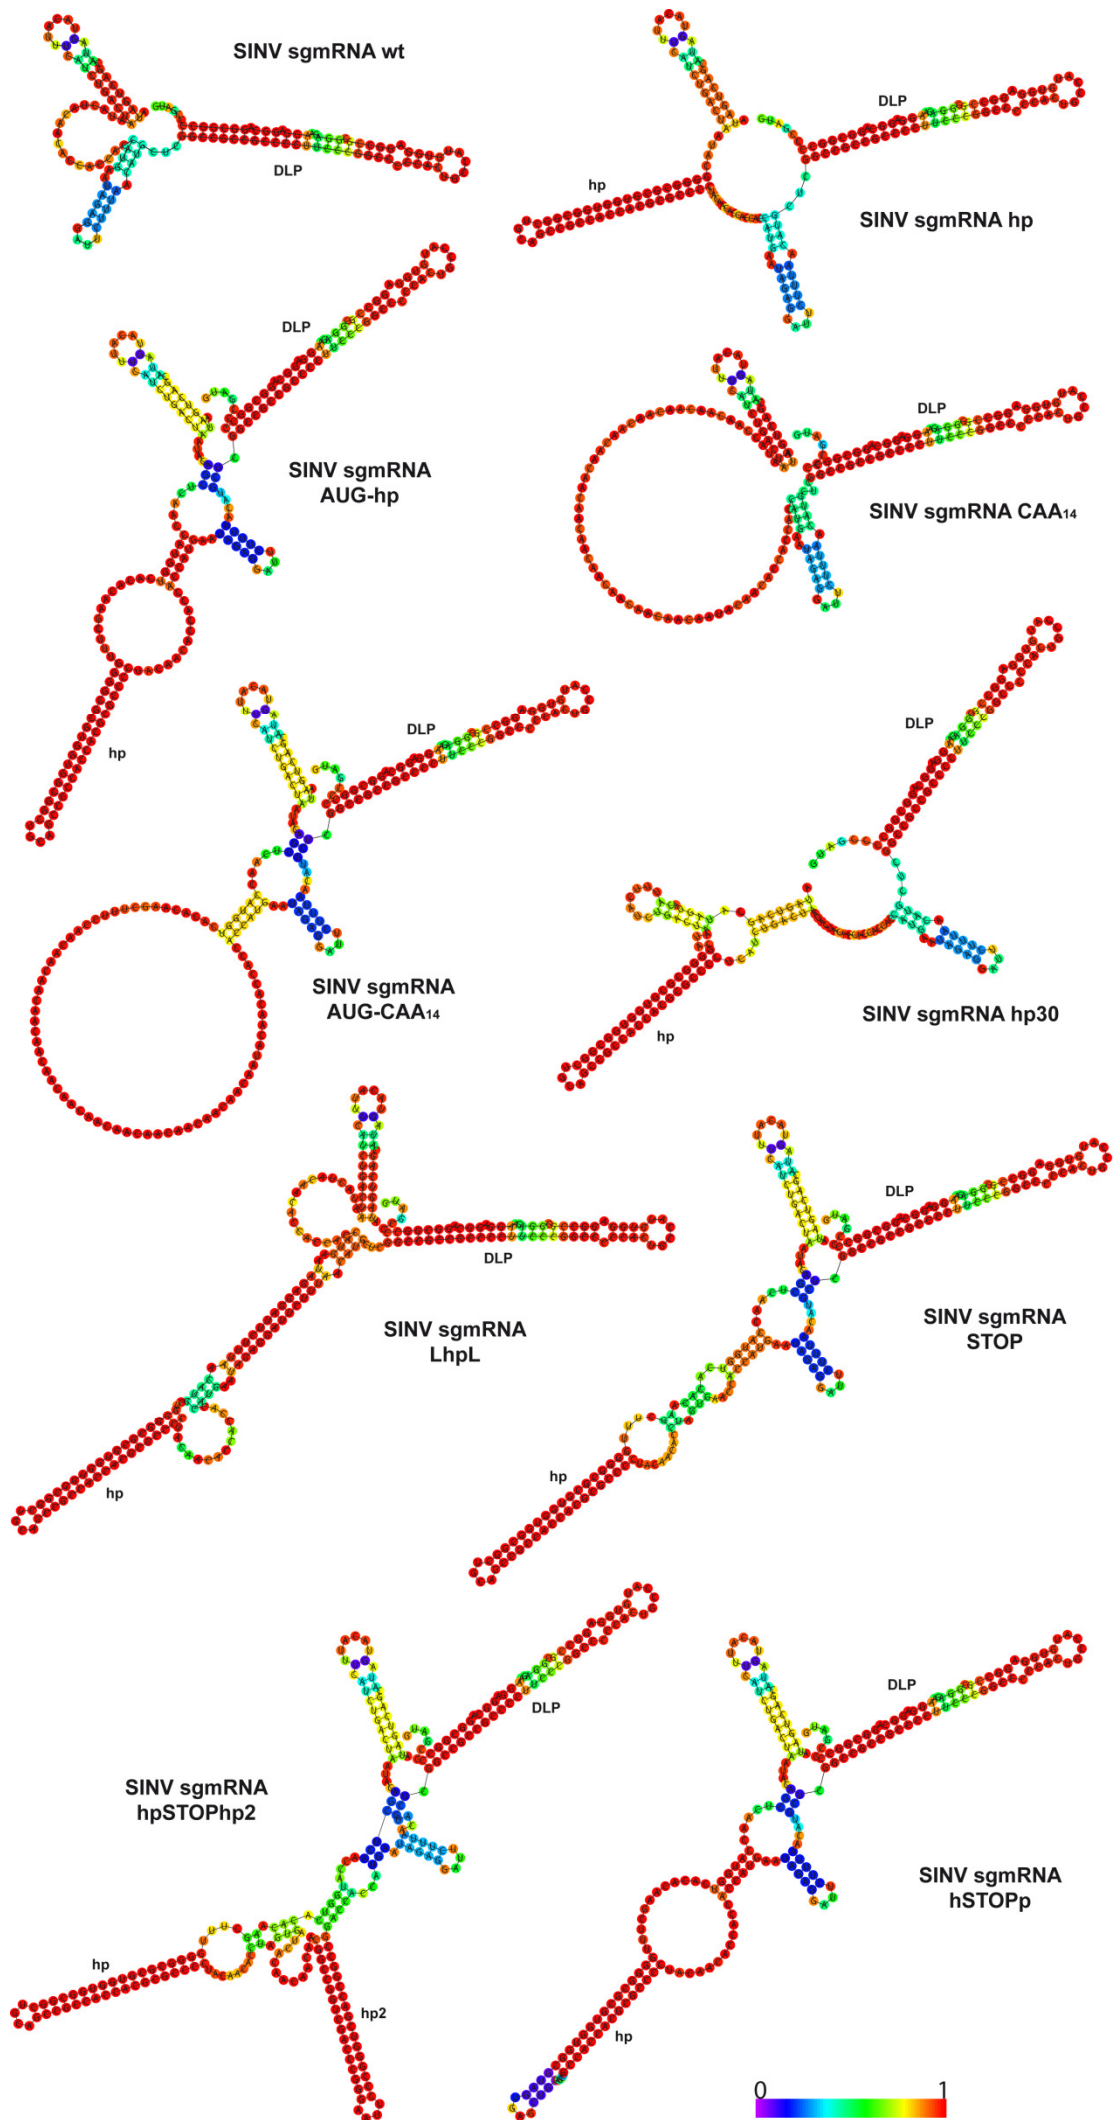

**Figure S2. Base-pairing probabilities of the 5' end of different SINV sgmRNAs.**

Minimum free energy secondary structure was generated using the RNAfold program for each of the SINV sgmRNA leader sequences described in this work. The predicted structures are colored by base-pairing probabilities. Unpaired bases are colored according to the probability of being unpaired.

**Table S1.** Nomenclature of plasmids, replicons, sgmRNAs and mRNAs.

| Plasmid                             | replicon/gmRNA                  | sgmRNA                      | Reference | Product obtained by <i>in vitro</i> transcription                                                                                                                                                                                                                                           |
|-------------------------------------|---------------------------------|-----------------------------|-----------|---------------------------------------------------------------------------------------------------------------------------------------------------------------------------------------------------------------------------------------------------------------------------------------------|
| pT7 rep C+luc                       | rep C+luc                       | C+luc                       | (1)       | SINV replicon bearing the C protein followed by the luc gene.                                                                                                                                                                                                                               |
| pT7 rep C+luc hp                    | rep C+luc hp                    | C+luc hp                    |           | SINV replicon bearing the C protein followed by the luc gene. Contains a hairpin structure inside the L26S.                                                                                                                                                                                 |
| pT7 rep C+luc AUG-hp                | rep C+luc AUG-hp                | C+luc AUG-hp                |           | SINV replicon bearing the C protein followed by the luc gene. Contains an AUG sequence in good context for translation before a hairpin structure inserted inside the L26S.                                                                                                                 |
| pT7 rep C+luc CAA <sub>14</sub>     | rep C+luc CAA <sub>14</sub>     | C+luc CAA <sub>14</sub>     |           | SINV replicon bearing the C protein followed by the luc gene. Contains an unstructured insert inside the L26S.                                                                                                                                                                              |
| pT7 rep C+luc AUG-CAA <sub>14</sub> | rep C+luc AUG-CAA <sub>14</sub> | C+luc AUG-CAA <sub>14</sub> |           | SINV replicon bearing the C protein followed by the luc gene. Contains an AUG sequence in good context for translation before an unstructured sequence inserted inside the L26S.                                                                                                            |
| pT7 rep C+luc LhpL                  | rep C+luc LhpL                  | C+luc LhpL                  |           | SINV replicon bearing the C protein followed by the luc gene. Contains two similar sequences corresponding to nucleotides 35-75 of wt L26S (including the AUG start codon), before and after a hairpin structure inserted inside the L26S.                                                  |
| pT7 rep C+luc STOP                  | rep C+luc STOP                  | C+luc STOP                  |           | SINV replicon bearing the C protein followed by the luc gene. Contains an AUG sequence in good context for translation before a hairpin structure inserted inside the L26S, and two in-frame stop codons downstream of this hairpin.                                                        |
| pT7 rep C+luc hpSTOPhp2             | rep C+luc hpSTOPhp2             | C+luc hpSTOPhp2             |           | SINV replicon bearing the C protein followed by the luc gene. Contains an AUG sequence in good context for translation before a hairpin structure inserted inside the L26S, two in-frame stop codons downstream of this hairpin, and a second hairpin structure following both stop codons. |
| pT7 rep C+luc hSTOPp                | rep C+luc hSTOPp                | C+luc hSTOPp                |           | SINV replicon bearing the C protein followed by the luc gene. Contains inside the L26S an AUG sequence in good context for translation before a hairpin structure that contains two in-frame stop codons.                                                                                   |
| pT7 rep C+luc hp30                  | rep C+luc hp30                  | C+luc hp30                  |           | SINV replicon bearing the C protein followed by the luc gene. Contains a hairpin structure inside the L26S, separated 30nts from the initiator AUG.                                                                                                                                         |
| pT7 C+luc                           |                                 | C+luc                       | (1)       | SINV sgmRNA bearing the C protein followed by the luc gene. This mRNA is unable to replicate.                                                                                                                                                                                               |
| pT7 C+luc hp                        |                                 | C+luc hp                    |           | SINV sgmRNA bearing the C protein followed by the luc gene. Contains a hairpin structure inside the L26S. This mRNA is unable to replicate.                                                                                                                                                 |

|                                                                                                                                                                                                                                                                                             |                       |                                 |     |                                                                                                                                                                                                                  |
|---------------------------------------------------------------------------------------------------------------------------------------------------------------------------------------------------------------------------------------------------------------------------------------------|-----------------------|---------------------------------|-----|------------------------------------------------------------------------------------------------------------------------------------------------------------------------------------------------------------------|
| pT7 C+luc<br>AUG-hp                                                                                                                                                                                                                                                                         |                       | C+luc AUG-<br>hp                |     | SINV sgmRNA bearing the C protein followed by the luc gene. Contains an AUG sequence in good context for translation before a hairpin structure inserted inside the L26S. This mRNA is unable to replicate.      |
| pT7 C+luc<br>CAA <sub>14</sub>                                                                                                                                                                                                                                                              |                       | C+luc<br>CAA <sub>14</sub>      |     | SINV sgmRNA bearing the C protein followed by the luc gene. Contains an unstructured insert inside the L26S. This mRNA is unable to replicate.                                                                   |
| pT7 C+luc<br>AUG-CAA <sub>14</sub>                                                                                                                                                                                                                                                          |                       | C+luc AUG-<br>CAA <sub>14</sub> |     | SINV sgmRNA bearing the C protein followed by the luc gene. Contains an AUG sequence in good context for translation before an unstructured sequence inserted inside the L26S. This mRNA is unable to replicate. |
| pT7 SVwt                                                                                                                                                                                                                                                                                    | wt                    | wt                              | (2) | SINV genome containing all the replicative and structural proteins.                                                                                                                                              |
| pT7 SV<br>AUG-<br>CAA <sub>14</sub>                                                                                                                                                                                                                                                         | AUG-CAA <sub>14</sub> | AUG-CAA <sub>14</sub>           |     | SINV genome containing all the replicative and structural proteins. Includes an AUG sequence in good context for translation before an unstructured sequence inserted inside the L26S.                           |
| <b>Abbreviations:</b> <i>gmRNA</i> , genomic mRNA; <i>sgmRNA</i> , subgenomic mRNA; <i>SINV</i> , Sindbis Virus; <i>nsPs</i> , non-structural proteins; <i>L26S</i> , leader sequence of SINV sgmRNA; <i>luc</i> , luciferase; <i>sPs</i> , structural proteins; <i>C</i> , capsid protein. |                       |                                 |     |                                                                                                                                                                                                                  |

## References

1. **Sanz MA, Castello A, Carrasco L.** 2007. Viral translation is coupled to transcription in Sindbis virus-infected cells. *J Virol* **81**:7061-7068.
2. **Sanz MA, Carrasco L.** 2001. Sindbis virus variant with a deletion in the 6K gene shows defects in glycoprotein processing and trafficking: lack of complementation by a wild-type 6K gene in trans. *J Virol* **75**:7778-7784.

**Table S2.** List of primers used in this work.

| <b>Mutant</b>         | <b>Primer name</b>      | <b>5'- 3' sequence</b>                                                                                                    |
|-----------------------|-------------------------|---------------------------------------------------------------------------------------------------------------------------|
| hp                    | 5'hp                    | CATCTGACTAATACGGGGCGCGTGGTGGCGGCTGCAGCCGCC<br>ACCACGCGCCCCCTACAACACCACCACCATGAATAG                                        |
|                       | 3'hp                    | GTGGTGGTGTGTAGGGGCGCGTGGTGGCGGCTGCAGCCGCC<br>ACCACGCGCCCCGTATTAGTCAGATGAAATG                                              |
| AUG-hp                | 5'AUG-hp                | CATCTGACTAATACAGCTCAACCATGGTCACACAAGCTTTGGGG<br>CGCGTGGTGGCGGC                                                            |
|                       | 3'AUG-hp                | CCACCACGCGCCCCAAAGCTTGTGTGACCATGGTTGAGCTGTA<br>TTAGTCAGATGAAATG                                                           |
| CAA <sub>14</sub>     | 5'CAA <sub>14</sub>     | CATCTGACTAATACCAACAACAACAACAACAACAACAACAAC<br>AACAACAACAATAACACCACCACCATGAATAG                                            |
|                       | 3'CAA <sub>14</sub>     | GTGGTGGTGTGTATTGTTGTTGTTGTTGTTGTTGTTGTTGTTGT<br>TGTGTTGTTGGTATTAGTCAGATGAAATG                                             |
| AUG-CAA <sub>14</sub> | 5'AUG-CAA <sub>14</sub> | AGCTCAACCATGGTCACACAAGCTTTCCAACAACAACAACA<br>ACAACAACAACAACAACAACAACAATAAC                                                |
|                       | 3'AUG-CAA <sub>14</sub> | GTTGTTGTTGTTGTTGTTGTTGAAAGCTTGTGTGACCATGGTTGAG<br>CTGTATTAGTCAGATG                                                        |
| LhpL                  | 3'LhpL                  | GGCGGCTGCAGCCGCCACCACGCGCCCCAGCATGTTAAAGAAT<br>CCTCTATTCATGGTGGTGGTGGTGTGTAGTATTAGTCAGATGAAATG                            |
| STOP                  | 5'STOPAUG-hp            | GGCGGCTGCAGCCGCCACCACGCGCCCCCTACAACACCTAGTGA<br>ACCACCATGAATAG                                                            |
| hpSTOPhp2             | 5'hpSTOPhp2             | GGCGGCTGCAGCCGCCACCACGCGCCCCCTACAACACCTAGTGA<br>TCACAACAACAACGGCCGGTTCGACCCGGGAATTCGCGGGTTCGA<br>CCGGCCGGACCACCATGAATAGAG |
| hSTOPp                | 3'hSTOPp                | GGCGGCTGCAGCTCACTACGCCACCACGCGCCCCAAAGCTTGT<br>GTGACCATGGTTG                                                              |
| hp30                  | 5'hp30                  | GGCGGCTGCAGCCGCCACCACGCGCCCCCTCATCTGACTAATACT<br>ACAACACCACCACCATGAATAGAGG                                                |
|                       | 5' Hpa                  | GCTATGGCGTTAACCGGTCTG                                                                                                     |
|                       | 3' Aat                  | CGTTCCTTGACGTCGAAC                                                                                                        |
|                       | 5'Sacl-<br>T7prom       | GCGCGGAGCTCTAATACGACTCACTATAGATAGTCAGCATAGT                                                                               |
|                       | Left luc2               | AGGTCTTCCCGACGATGA                                                                                                        |
|                       | Right luc2              | GTCTTTCCGTGCTCCAAAAC                                                                                                      |
|                       | Left Act2               | CTCTCCCTCATGCCATCCT                                                                                                       |
|                       | Right Act2              | GTAGCCACGCTCGGTCAG                                                                                                        |
